# Supplementary material
Source: publisher figshare collection journal article supplement (https://asha.figshare.com/articles/dataset/_/21357684)
Supplement: Supplementary file 1 [file 1]

## Supplemental Material S8. Mathematics.

| Math Level         | Skills                                                                                                                                  |
|--------------------|-----------------------------------------------------------------------------------------------------------------------------------------|
| Pre-math Level     | 1. Has preferences and non-preferences                                                                                                  |
|                    | 2. Understands familiar cause-and-effect activities                                                                                     |
|                    | 3. Understands sequence of events or routine in a familiar activity                                                                     |
|                    | 4. Has earlier classification/comparison/contrast (e.g., makes noise vs. does not make noise)                                           |
| Emerging Level     | 1. Demonstrates awareness of quantity by communicating "more"/"again"                                                                   |
|                    | 2. Demonstrates knowledge of daily schedule (e.g., "What's next?")                                                                      |
|                    | 3. Participants in counting activities but has no one-to-one correspondence                                                             |
|                    | 4. Demonstrates knowledge that objects can be compared by size, length, weight, or capacity                                             |
| Preschool Level    | 1. Counts from 1 to 10                                                                                                                  |
|                    | 2. Counts objects using one-to-one correspondence                                                                                       |
|                    | 3. Sorts and classifies objects                                                                                                         |
| Kindergarten Level | 1. Counts to 100 by ones and tens                                                                                                       |
|                    | 2. Writes numbers from 0 to 20                                                                                                          |
|                    | 3. Counts to answer "how many" questions about as many as 20 things                                                                     |
|                    | 4. Identifies whether the number of objects in one group is greater than, less than, or equal to the number of objects in another group |
|                    | 5. Names the days of the week, month, and/or date                                                                                       |
|                    | 6. Identifies the time to the nearest hour                                                                                              |
| Higher Grade Level | 1. Adds and subtracts within 20                                                                                                         |
|                    | 2. Counts to 120                                                                                                                        |
|                    | 3. Tells and writes time in hours and half-hour using analog and digital clocks                                                         |
|                    | 4. Recognizes and knows the value of coins                                                                                              |
