# Supplementary material
Source: publisher figshare collection journal article supplement (https://asha.figshare.com/articles/dataset/_/21357684)
Supplement: Supplementary file 2 [file 1]

# **Supplemental Material S4. AAC access methods.**

| <b>Type of Access</b>          | <b>Access Method</b>                               |
|--------------------------------|----------------------------------------------------|
| Nonelectronic                  | 1. Direct selection _hand, elbow, etc.             |
|                                | 2. Direct selection _eye gaze                      |
|                                | 3. Speech                                          |
|                                | 4. PAAS                                            |
| Electronic - Recorded Messages | 1. Direct selection _body part (hand, elbow, etc.) |
|                                | 2. Switch                                          |
|                                | 3. PAAS                                            |
| Electronic - SGDs              | 1. PAAS                                            |
|                                | 2. Direct                                          |
|                                | 3. Switch                                          |
|                                | 4. Eye gaze                                        |
