# Supplementary material
Source: publisher figshare collection journal article supplement (https://asha.figshare.com/articles/dataset/_/21357684)
Supplement: Supplementary file 3 [file 1]

### Supplemental Material S3. AAC modes.

| Type of Modes                             | AAC Tool/Technique                                           |
|-------------------------------------------|--------------------------------------------------------------|
| No-tech/Body-based                        | 1. Gestures (e.g., head shake, yes/no, reaching, pointing)   |
|                                           | 2. Manual signs (e.g., drink, more)                          |
|                                           | 3. Eye gaze                                                  |
|                                           | 4. Vocalizations (e.g., laughing, squealing, babbling)       |
|                                           | 5. Facial expressions (e.g., happy, angry, sad, questioning) |
|                                           | 6. Speech (e.g., recognizable words/word approximations)     |
|                                           | 7. Pantomime                                                 |
|                                           | 8. Body posture/movement                                     |
| Low-tech/Nonelectronic                    | 1. Environmental display                                     |
|                                           | 2. Communication book(s) with symbols/photos/text            |
|                                           | 3. Communication board(s) with symbols/photos/text           |
|                                           | 4. Eye-Tracking board (e.g., ETRAN) with symbols/photos/text |
|                                           | 5. Commercial AAC products (e.g., PODD, PECS, etc.)          |
|                                           | 6. Other                                                     |
| Light-tech/Electronic - Recorded Messages | 1. Step-by-step                                              |
|                                           | 2. Talking bric                                              |
|                                           | 3. Go talk                                                   |
|                                           | 4. Big mac                                                   |
|                                           | 5. Super talker                                              |
|                                           | 6. iPad (dependent on app)                                   |
|                                           | 7. Other                                                     |
| High-tech/Electronic – SGDs               | 1. iPad (dependent on app)                                   |
|                                           | 2. Tobii                                                     |
|                                           | 3. Smart box                                                 |
|                                           | 4. Dynavox (e.g., Vmax, Maestro, etc.)                       |
|                                           | 5. PRC (e.g., Pathfinder, Springboard, Accent, etc.)         |
|                                           | 6. Saltillo (e.g., NovaChat)                                 |
|                                           | 7. Other                                                     |
