# Supplementary material
Source: publisher figshare collection journal article supplement (https://asha.figshare.com/articles/dataset/_/21357684)
Supplement: Supplementary file 4 [file 1]

**Supplemental Material S2.** Supports for positioning, mobility, vision, and writing.

| <b>Areas of Supports</b> | <b>Type of Support</b>   |
|--------------------------|--------------------------|
| Positioning              | 1. Stander               |
|                          | 2. Custom seating        |
|                          | 3. High or low chair     |
|                          | 4. Headrest              |
|                          | 5. Chin or neck support  |
|                          | 6. Hand splints          |
|                          | 7. Arm/elbow immobilizer |
|                          | 8. Keyguard              |
|                          | 9. Lap tray              |
|                          | 10. SubASIS bars         |
| Mobility                 | 1. Manual chair          |
|                          | 2. Power chair           |
|                          | 3. Hands-free walker     |
|                          | 4. Stroller              |
| Vision                   | 1. Glasses               |
|                          | 2. Light box             |
|                          | 3. Light box             |
|                          | 4. Tablet computer       |
| Writing                  | 1. IntelliKeys           |
|                          | 2. Intellitools          |
|                          | 3. Microsoft Office      |
|                          | 4. Clicker               |
|                          | 5. Printer               |
|                          | 6. Drawing/art software  |
|                          | 7. Adapted tools         |
