# Supplementary material
Source: publisher figshare collection journal article supplement (https://asha.figshare.com/articles/dataset/_/21357684)
Supplement: Supplementary file 5 [file 1]

## Supplemental Material S6. Communicative competence and self-determination.

Note: Self-determination items are presented in bold italics

| Areas of Competence    | Skills                                                                                                                 |
|------------------------|------------------------------------------------------------------------------------------------------------------------|
| Operational Competence | 1. Touches/activates a nonelectronic or electronic display                                                             |
|                        | 2. Touches/activates a nonelectronic or electronic/digitized device (e.g., SBS) to communicate a message intentionally |
|                        | 3. Selects target AAC symbols on a nonelectronic display (e.g., communication board, etc.)                             |
|                        | 4. Selects target AAC symbols on an electronic/digitized device (e.g., Go Talk, iPad, etc.)                            |
|                        | 5. Selects target AAC symbols on an SGD                                                                                |
|                        | 6. Navigates from pages on a nonelectronic system                                                                      |
|                        | 7. Navigates from pages on an SGD                                                                                      |
|                        | 8. Picks up a target symbol and hands it to partner                                                                    |
|                        | 9. Uses paper and pencil to draw/write a concept                                                                       |
|                        | <b>10. Understands how to set up/access his/her AAC equipment (turn on, charge device, etc.)</b>                       |
|                        | <b>11. Can direct others to set up his/her AAC equipment (turn on, charge device, etc.)</b>                            |
|                        | 12. Other                                                                                                              |
| Linguistic Competence  | 1. Follows simple directions                                                                                           |
|                        | 2. Follows multistep directions                                                                                        |
|                        | 3. Uses single words/symbols                                                                                           |
|                        | 4. Uses preprogrammed phrases                                                                                          |
|                        | 5. Generates multiword utterances                                                                                      |
|                        | 6. Uses nouns, verbs                                                                                                   |
|                        | 7. Uses interrogatives/questions                                                                                       |
|                        | 8. Uses adjectives and adverbs                                                                                         |
|                        | 9. Uses prepositions                                                                                                   |
|                        | 10. Uses syntactic/morphological markers                                                                               |
|                        | 11. Constructs grammatically correct sentences                                                                         |
|                        | 12. Uses letters/numbers to generate messages (encoding)                                                               |
| Social Competence      | 1. Expresses interest in other people                                                                                  |
|                        | 2. Establishes joint attention                                                                                         |
|                        | 3. Participates actively in interactions                                                                               |
|                        | 4. Takes turns                                                                                                         |
|                        | <b>5. Protests/refuses</b>                                                                                             |
|                        | <b>6. Requests</b>                                                                                                     |
|                        | <b>7. Makes choices</b>                                                                                                |
|                        | 8. Comments                                                                                                            |
|                        | <b>9. Initiates interactions</b>                                                                                       |
|                        | <b>10. Establishes a conversation topic</b>                                                                            |
|                        | 11. Answers questions                                                                                                  |

|                      |                                                             |
|----------------------|-------------------------------------------------------------|
|                      | 12. <i>Asks questions</i>                                   |
|                      | 13. <i>Expresses feelings/emotions</i>                      |
|                      | 14. Maintains interactions over multiple turns              |
|                      | <b>15. <i>Clarifies information</i></b>                     |
|                      | 16. Participates actively in a group discussion             |
|                      | <b>17. <i>Leads a group discussion</i></b>                  |
| Strategic Competence | <b>1. <i>Obtains attention</i></b>                          |
|                      | <b>2. <i>Indicates communication breakdowns</i></b>         |
|                      | <b>3. <i>Repairs communication breakdowns</i></b>           |
|                      | <b>4. <i>Introduces self</i></b>                            |
|                      | <b>5. <i>Gives partner directions re: communication</i></b> |
|                      | <b>6. <i>Explains AAC system</i></b>                        |
|                      | <b>7. <i>Repeats, rephrases</i></b>                         |
|                      | <b>8. <i>Tells you first letter</i></b>                     |
|                      | <b>9. <i>Advocates for self</i></b>                         |
|                      | 10. Other                                                   |
