# Supplementary material
Source: publisher figshare collection journal article supplement (https://asha.figshare.com/articles/dataset/_/21357684)
Supplement: Supplementary file 6 [file 1]

## Supplemental Material S1. Evaluation protocols used at TBS. List of data collection forms.

**Examples of Evaluation Protocols used.** *Early Communicative Forms and Functions; The MacCarthur – Bates Communicative Development Inventory; Desired Results Developmental Profile (DRDP), Social Networks: A Communication Inventory for Individuals with Complex Communication Needs and their Communication Partners; The Communication Matrix; Developmental Writing Scale.*

### Data Collection Forms

| Data Collection Form Name                   | Data Collection Form Function                                                                                                                                                                                                                 |
|---------------------------------------------|-----------------------------------------------------------------------------------------------------------------------------------------------------------------------------------------------------------------------------------------------|
| Demographic_Stable                          | Code information on a student’s demographic information that is stable across years (e.g., gender, congenital medical diagnoses, etc.)                                                                                                        |
| Demographic_Medical                         | Code information on a student’s acquired diagnoses and medication being taken during a particular school year that might impact participation/ performance.                                                                                   |
| Equipment_AAC                               | Code information on the type of AAC methods that student uses or demonstrates the ability to use and how a student accesses body-based, non-electronic or electronic systems                                                                  |
| Equipment_AT & DME                          | Code information on various assistive technology devices that a student uses to support hearing, vision, mobility, etc.                                                                                                                       |
| Language & Display Characteristics          | Code information on the language and display characteristics of student’s AAC systems or student’s emerging abilities that can be utilized to develop a system (e.g., expressive language representations, navigation, etc.)                  |
| Communicative Competence/Self-Determination | Code information on a student’s competence in the following areas: social communication, linguistics, operational and strategic, as well as information on a student’s self-determination skills and specify type of expressive communicator. |
| CVI Range                                   | Collect a student’s scores on the CVI Range: Within-CVI Characteristics Assessment Method (Rating II) Form.                                                                                                                                   |
| Literacy                                    | Code information on a student’s literacy skills during interactions with books/stories (e.g., early emergent, etc.).                                                                                                                          |
| Math                                        | Code information on a student’s math skills (e.g., pre-math level, preschool level, etc.)                                                                                                                                                     |
| Mobility                                    | Code information on a student’s use of upright hands-free mobility devices and power wheelchairs                                                                                                                                              |
