# Supplementary material
Source: publisher figshare collection journal article supplement (https://asha.figshare.com/articles/dataset/_/21357684)
Supplement: Supplementary file 7 [file 1]

**Supplemental Material S5. Language representation.**

| <b>Type of Language Representation Method</b>                           |
|-------------------------------------------------------------------------|
| 1. Tangible symbols (real objects, miniature objects, parts of objects) |
| 2. Gestures                                                             |
| 3. Manual signs                                                         |
| 4. Speech                                                               |
| 5. PAAS                                                                 |
| 6. Photos                                                               |
| 7. Visual Scenes                                                        |
| 8. Pictographic symbols                                                 |
| 9. Letters/numbers                                                      |
| 10. Written words/phrases                                               |
