# Supplementary material
Source: publisher figshare collection journal article supplement (https://asha.figshare.com/articles/dataset/_/21357684)
Supplement: Supplementary file 8 [file 1]

## Supplemental Material S7. Literacy.

| Areas of Literacy     | Skills                                                                                                                                    |
|-----------------------|-------------------------------------------------------------------------------------------------------------------------------------------|
| Early Emergent Skills | 1. Engages in an activity that involves a book                                                                                            |
|                       | 2. Engages in an activity that involves songs/music/singing                                                                               |
|                       | 3. Engages in an activity that involves drawing/writing                                                                                   |
|                       | 4. Chooses a book                                                                                                                         |
|                       | 5. Participates in repeated line reading using switches, gestures, or vocalizations                                                       |
|                       | 6. Predicts/anticipates story                                                                                                             |
|                       | 7. Engages in an activity that involves rhyming                                                                                           |
| Emergent Skills       | 1. Listen to book/story read aloud                                                                                                        |
|                       | 2. Understands pictures in books representing things in the real world                                                                    |
|                       | 3. Identifies pictures in books by pointing, labeling, or responding to questions about the picture (e.g., where is, what is, who is ...) |
|                       | 4. Remembers details from stories                                                                                                         |
|                       | 5. Answers simple questions regarding the book/story                                                                                      |
|                       | 6. Shows interests in logos/print/graphics/letters                                                                                        |
|                       | 7. Relates books/stories to personal experiences                                                                                          |
|                       | 8. Identifies character's feelings (empathy)                                                                                              |
|                       | 9. Engages in activities involving scribbling or putting a string of letters together                                                     |
| Alphabet              | 1. Knows letters have names                                                                                                               |
|                       | 2. Identifies some letters (e.g., letters in own name)                                                                                    |
|                       | 3. Identifies more than 10 letters                                                                                                        |
| Phonics               | 1. Matches sounds to appropriate letters                                                                                                  |
|                       | 2. Identifies sound/letter in initial position of words (e.g., CVC, CVCC, etc.)                                                           |
|                       | 3. Identifies sound/letter in final position of words (e.g., CVC, CVCC, etc.)                                                             |
|                       | 4. Identifies sound/letter in medial position of words (e.g., CVC, CVCC, etc.)                                                            |
|                       | 5. Can blend phonemes/letter sounds for words (e.g., CVC, CVCC, etc.)                                                                     |
| Word Reading          | 1. Recognizes print in the environment (e.g., name, signs, etc.)                                                                          |
|                       | 2. Reads some high frequency words (i.e., familiar, sight words)                                                                          |
|                       | 3. Is able to decode some words                                                                                                           |
|                       | 4. Is able to read sentences                                                                                                              |
|                       | 5. Is able to read paragraphs/short stories                                                                                               |
| Writing               | 1. Uses invented spelling                                                                                                                 |
|                       | 2. Writes letters (e.g., consonants/vowels)                                                                                               |
|                       | 3. Writes names                                                                                                                           |
|                       | 4. Writes high frequency words                                                                                                            |
|                       | 5. Selects a topic/picture and describes with support                                                                                     |
|                       | 6. Writes sentences                                                                                                                       |

|               |                                                                |
|---------------|----------------------------------------------------------------|
|               | 7. Writes 2-3 sentences/short paragraphs with a coherent topic |
| Comprehension | 1. Uses prior knowledge                                        |
|               | 2. Predicts                                                    |
|               | 3. Identifies main idea                                        |
|               | 4. Asks questions about the text                               |
|               | 5. Makes inferences                                            |
